# Supplementary material
Source: PubMed Central journal article supplement (PMC8380706)
Supplement: NIHMS1707827-supplement-1.pdf [file NIHMS1707827-supplement-1.pdf]

## Supplementary Information

### Optogenetic control of the canonical Wnt signaling pathway during *Xenopus laevis* embryonic development

Vishnu V. Krishnamurthy<sup>1</sup>, Hyejeong Hwang<sup>2</sup>, Jia Fu<sup>2</sup>, Jing Yang<sup>2,\*</sup>, Kai Zhang<sup>1,\*</sup>

<sup>1</sup> Department of Biochemistry, University of Illinois at Urbana-Champaign, Urbana, IL 61801, USA

<sup>2</sup> Department of Comparative Biosciences, University of Illinois at Urbana-Champaign, Urbana, IL 61802, USA

**Figure S1:** Flow cytometry analysis of HEK293T cells co-transfected with  $\beta$ -catenin-mRuby2 and optoLRP6opt (or CIBN-GFP-CaaX for the negative control).

**Figure S2:** Comparison of optoLRP6opt and CRY2-mCh-LRP6c in mammalian cells and *Xenopus laevis* embryos.

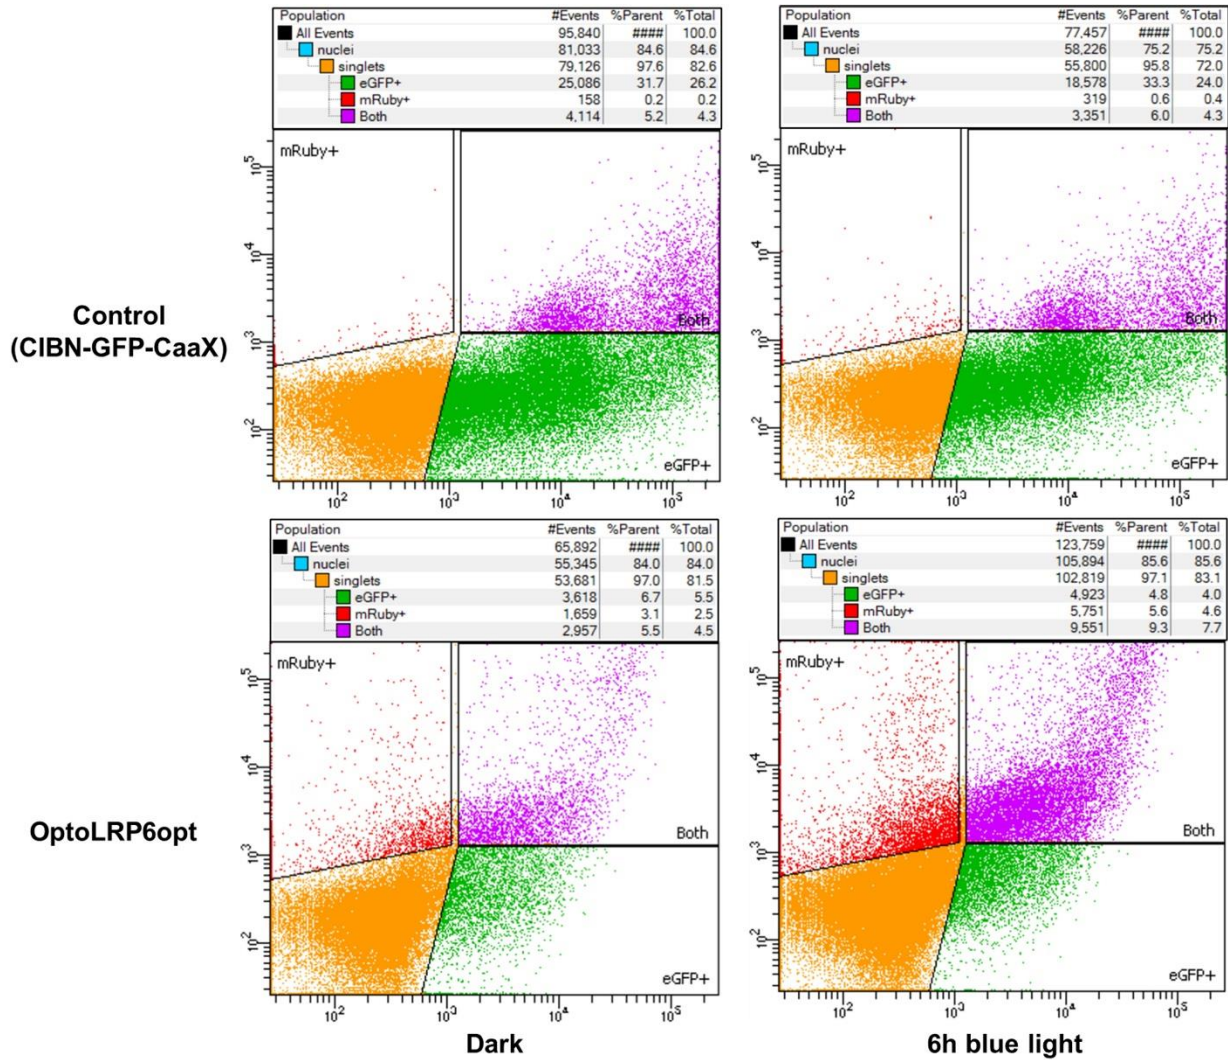

**Figure S1:** Flow cytometry analysis of HEK293T cells co-transfected with  $\beta$ -catenin-mRuby2 and optoLRP6opt (or CIBN-EGFP-CaaX for the negative control). Cells were categorized into different groups, including non-transfected (orange),  $\beta$ -catenin-mRuby2 singly transfected (red), optoLRP6opt (or CIBN-EGFP-CaaX) singly transfected (green), or doubly-transfected (pink). These cells were then used to calculate results related to Figure 2 (d) and (e). Data at 0 h (Dark) and 6 h blue light stimulation were shown.

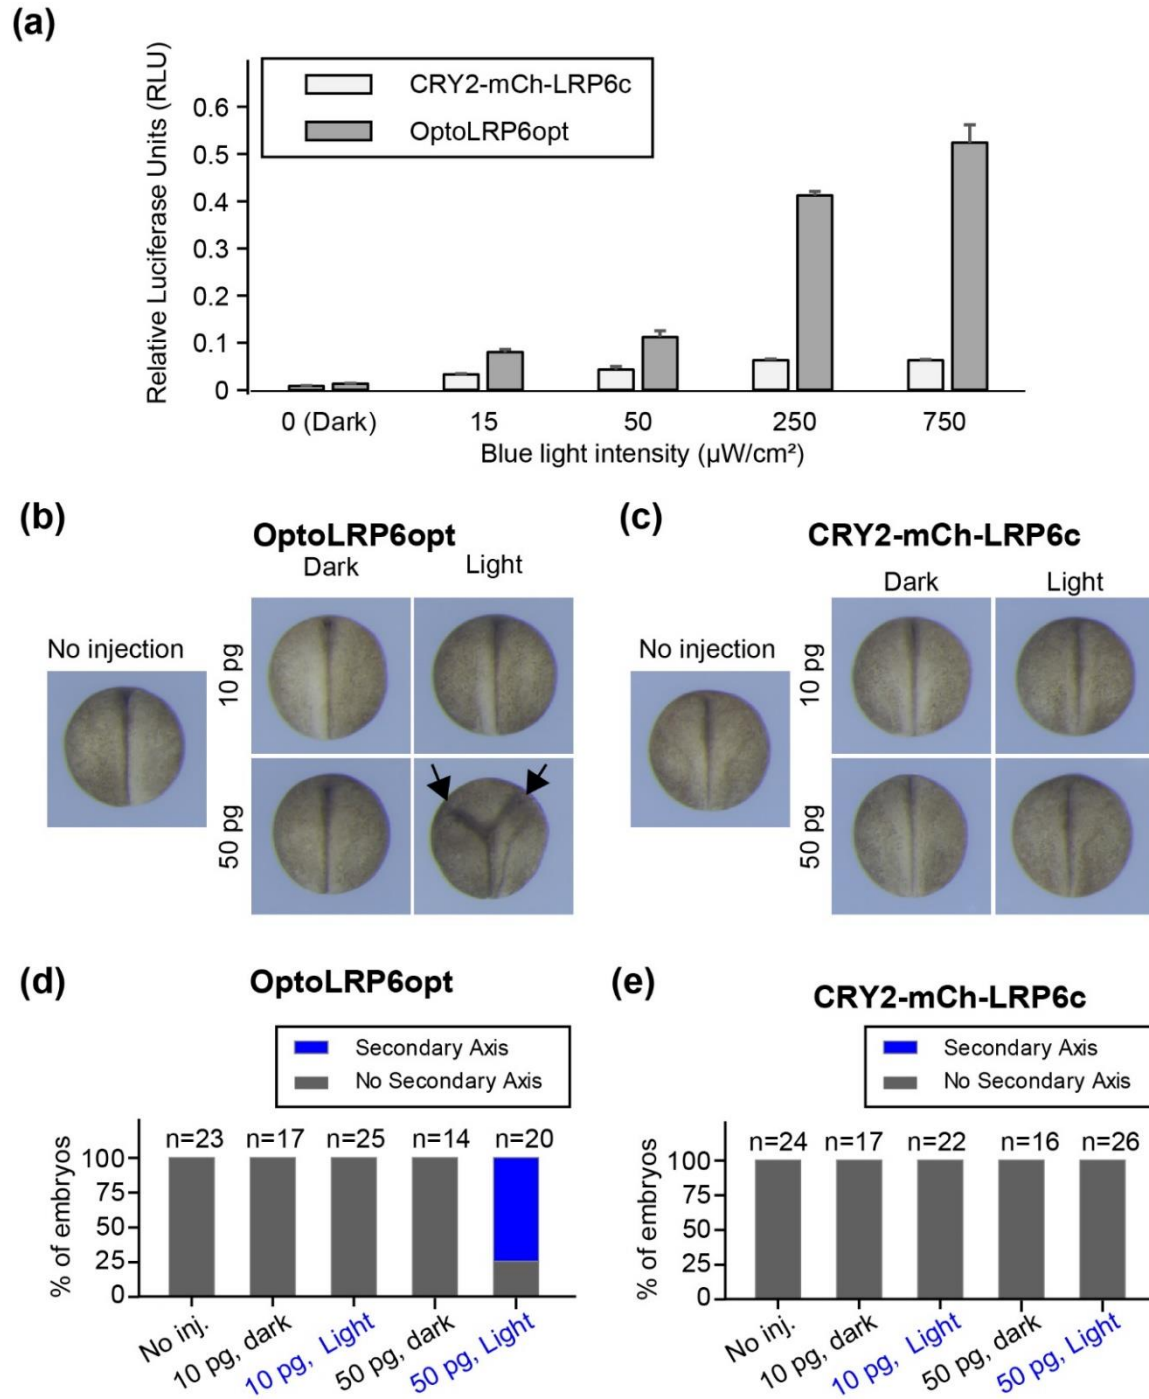

**Figure S2: Comparison of *optoLRP6opt* and *CRY2-mCh-LRP6c* in mammalian cells and *Xenopus laevis* embryos.** (a) HEK293T cells in 35mm dishes were transfected with 100ng of *CRY2-mCh-LRP6* or *OptoLRP6opt* alongside 100ng TopFlash reporter and 100 ng control luciferase reporter. 3h after transfection, the cells were illuminated for 24h at the indicated intensities of blue light. Values represent mean  $\pm$  s.d. of three biological replicates (n=3). (b) Dose-dependent blue light-activated *OptoLRP6opt*-injected, but not *CRY2-mCh-LRP6c*-injected (c), embryos examined at the neurula stage show two body axes (arrows). Quantification of axis duplication in embryos ventrally injected with *optoLRP6opt* (d) and *CRY2-mCh-LRP6c* (e). The number of embryos used for each condition is marked above the bars.
